# Supplementary material
Source: ML conference proceedings conference paper supplement (https://openreview.net/forum?id=Q0hm0_G1mpH)
Supplement: supplementary_material [file attachment]

## A Additional experiment details

We refer the reader to the VTAB<sup>[12]</sup> and Meta-Dataset<sup>[13]</sup> codebases for complete experimental details. Instructions on how to evaluate new approaches on VTAB+MD can be found at <https://github.com/google-research/meta-dataset/blob/main/VTAB-plus-MD.md>.

Experiments presented in this work are ran in two main computing infrastructure: TPU-v3 (all BIT experiments) and Nvidia V100 (rest).

For Prototypical networks, ProtoMAML and MD-Transfer, model and hyperparameter selection is based on the average query accuracy over episodes sampled from all of MD-v2’s validation classes. For each approach we perform a hyperparameter search using Triantafillou et al. [60]’s search space (Tables 1, 2, and 3 presented alongside the best values found), for a total of 99 runs for each approach.

We re-train CrossTransformers on episodes sampled from all ImageNet classes, with 50% of the episodes converted to SimCLR episodes — this corresponds to the CTX+SimCLR Eps setting in Doersch et al. [14]. We use the recommended hyperparameters and perform a light sweep over learning rates in {0.01, 0.001, 0.0006, 0.0001} and found Doersch et al. [14]’s recommended 0.0006 learning rate to be optimal in our case as well. Model selection is performed using MD-v2 validation episodes — this is a slight departure from CrossTransformers’ ImageNet-only protocol that is made necessary by the fact that all ImageNet classes participate in training episodes in MD-v2.

Since pre-trained SUR backbones were already made available by the authors [14] we re-used all of them with two exceptions: (1) we re-trained the ImageNet backbone on all ImageNet classes using the provided training script (because the original backbone was trained on Meta-Dataset’s ImageNet training classes), and (2) we ignored the VGG Flowers backbone (because the dataset is included as one of VTAB-v2’s downstream tasks). We ran Dvornik et al. [16]’s inference code as-is for evaluation.

All Big Transfer models are pre-trained as described in [31]. The pre-processing at training time is at 224 resolution, using random horizontal flipping and inception crop [57]. In all of our experiments, during transfer we only resize images to the desired resolution (126 or 224) at both fine-tuning and evaluation time. While higher resolution and further data augmentation further improves performance, we remove this additional confounding factor.

| Hyperparameter                           | Search space                  | Best      |
|------------------------------------------|-------------------------------|-----------|
| Backbone                                 | {ResNet-18, 4-layer convnet}  | ResNet-18 |
| Resolution                               | {84, 126}                     | 126       |
| Outer-loop LR                            | log-uniform(1e-6, 1e-2)       | 0.0004    |
| Outer-loop LR decay freq.                | {100, 500, 1k, 2.5k, 5k, 10k} | 1k        |
| Outer-loop LR decay rate                 | uniform(0.5, 1.0)             | 0.6478    |
| Inner-loop LR                            | log-uniform(5e-3, 5e-1)       | 0.0054    |
| Inner-loop steps                         | {1, 6, 10}                    | 10        |
| Additional inner-loop steps (evaluation) | {0, 5}                        | 0         |

Table 1: ProtoMAML hyperparameter search space.

## B Detailed figures and accuracy tables

We show a detailed breakdown of VTAB-V2 accuracies (Figure 7) for investigated approaches. We also provide detailed accuracy tables (Tables 4 through 9) for all plots displayed in the main text. For MD-v2 we show 95% confidence intervals computed over 60 episodes for BiT learners and 600 episodes for all other approaches.

<sup>12</sup>[https://github.com/google-research/task\\_adaptation](https://github.com/google-research/task_adaptation)

<sup>13</sup><https://github.com/google-research/meta-dataset>

<sup>14</sup><https://github.com/dvornikita/SUR>

| Hyperparameter                        | Search space                         | Best                   |
|---------------------------------------|--------------------------------------|------------------------|
| Backbone                              | {ResNet-18, 4-layer convnet}         | ResNet-18              |
| Resolution                            | {84, 126}                            | 126                    |
| Training LR                           | log-uniform(1e-6, 1e-2)              | 3.4293725734843445e-06 |
| Fine-tuning LR                        | {1e-5, 1e-4, 1e-3, 1e-2, 1e-1, 2e-1} | 1e-2                   |
| Fine-tuning steps                     | {50, 75, 100, 125, 150, 175, 200}    | 100                    |
| Fine-tune with Adam?                  | {True, False}                        | True                   |
| Cosine classifier head?               | {True, False}                        | True                   |
| Cosine logits multiplier              | {1, 2, 10, 100}                      | 10                     |
| Weight-normalize the classifier head? | {True, False}                        | True                   |
| Fine-tune all layers?                 | {True, False}                        | True                   |

Table 2: MD-Transfer hyperparameter search space.

| Hyper          | Search space                  | Best      |
|----------------|-------------------------------|-----------|
| Backbone       | {ResNet-18, 4-layer convnet}  | ResNet-18 |
| Resolution     | {84, 126}                     | 126       |
| LR             | log-uniform(1e-6, 1e-2)       | 0.0003    |
| LR decay freq. | {100, 500, 1k, 2.5k, 5k, 10k} | 500       |
| LR decay rate  | uniform(0.5, 1.0)             | 0.8857    |

Table 3: Prototypical Networks hyperparameter search space.

## C Bridging the Performance Gap Between MD-Transfer Baseline and ProtoMAML

Given the stark differences between ProtoMAML and MD-Transfer on VTAB-v2, we ran a few additional experiments in order to better explain these discrepancies. We swapped their evaluation hyperparameters, meaning that we fine-tuned MD-Transfer for 10 steps using a learning rate of 0.0054 without using a cosine classifier (**MD-Transfer (ProtoMAML hypers)**) and that we ran ProtoMAML’s inner-loop for 100 steps using a learning rate of  $1 \times 10^{-2}$  with a linear classification head (**ProtoMAML (MD-Transfer hypers)**). Note that this does not completely bridge the hyperparameter gap between the two approaches, but it does bring them closer to each other. The remaining differences are that (1) the validation procedure used for early stopping is different, and (2) ProtoMAML initializes the output layer with class prototypes, whereas the output layer weights in MD-Transfer are sampled from a normal distribution. Additionally, to isolate the effect of cosine-classification, we run MD-Transfer with a linear classification head while keeping the learning rate and number of training steps the same (**MD-Transfer (linear head)**).

**Figure 8** shows that ProtoMAML gets better results on MD-v2 with MD-Transfer hyperparameters (more fine-tuning steps with a smaller learning rate), with apparent gains on Quickdraw and Traffic Signs. ProtoMAML’s prototypical initialization seems to yield better performance for “in-domain” datasets (i.e. datasets participating to the training split of classes), however we observe diminishing returns for test-only datasets like Traffic Sign.

Disabling cosine classification (**MD-Transfer (linear head)**) seems to harm fine-tuning performance greatly on all datasets except QuickDraw. Traffic Signs in particular benefits greatly from a cosine classification head, as evidenced by the 10% drop in performance observed when switching to a linear classification head. On VTAB, again, MD-Transfer hyperparameters help improve ProtoMAML performance, hinting at the fact that the hyperparameter selection procedure used for ProtoMAML is sub-optimal.

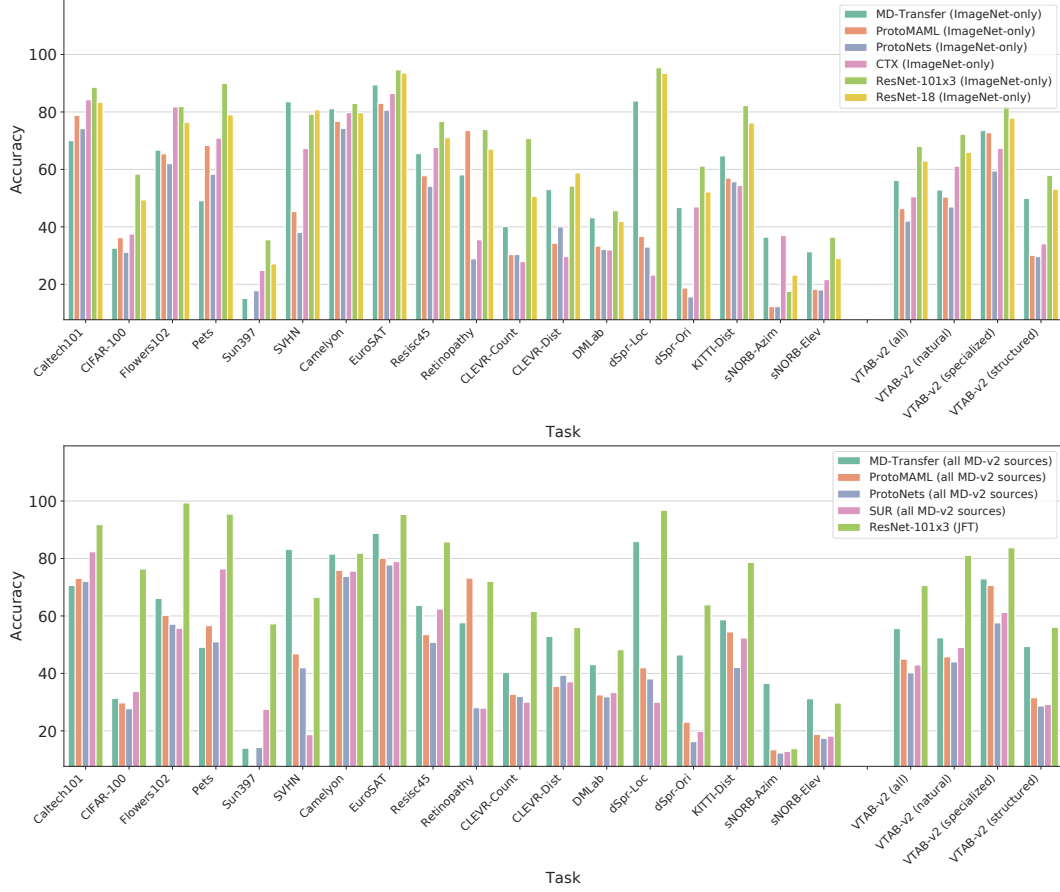

Figure 7: VTAB-v2 accuracies, broken down by downstream task, for approaches trained only on ImageNet (*top*) or larger-scale datasets (*bottom*).

## D Larger-scale SUR experiments

In this section we investigate increasing the capacity (ResNet-50) and input resolution ( $224 \times 224$ ) of SUR backbones. We re-train backbones for all seven of MD-v2’s training sources of data using BiT’s upstream training hyperparameters and adjusting the number of training steps as needed to ensure convergence. We trained two backbone variants: one with a regular linear classification head, and one with a temperature-adjusted cosine classifier head. Backbones were trained for:

- **ImageNet:** 90 epochs
- **Quickdraw:** 4 epochs
- **Birds, Omniglot, Fungi:** 900 epochs
- **Textures:** 1350 epochs
- **Aircraft:** 4500 epochs

The LR schedule is adjusted proportionally to the number of epochs. For simplicity we select the final backbone checkpoints rather than selecting based on an episodic loss.

**Figure 9** shows an appreciable 5% improvement on VTAB-v2, most of which is driven by an improvement on specialized tasks. On the other hand, the aggregate performance gain on MD-v2 is negligible. While performance on MSCOCO, Fungi, Birds, and Textures is increased significantly, the larger input resolution and backbone capacity has a negligible or detrimental effect on QuickDraw, Omniglot, and Aircraft. We hypothesize that the drop in Aircraft performance is due to the large batch size used by BiT and a suboptimal model selection strategy.

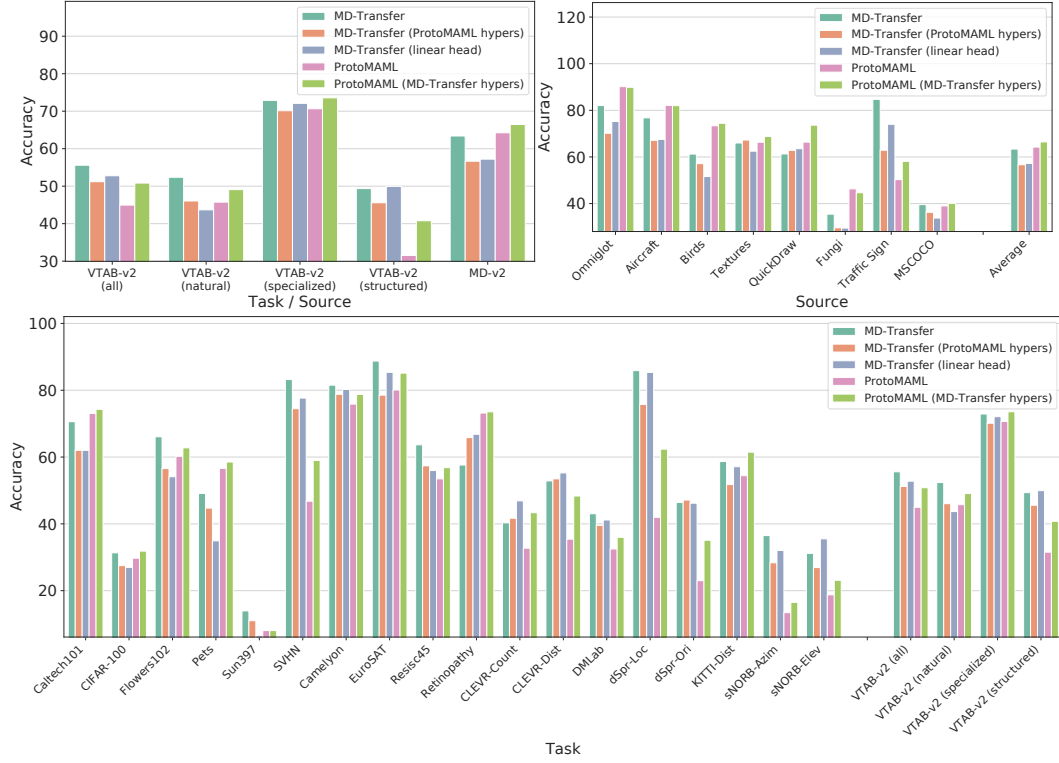

Figure 8: Ablation study for different hyper parameters found by ProtoMAML and MD-Transfer, broken down by downstream task. All backbones are trained the all MD-V2 training data.

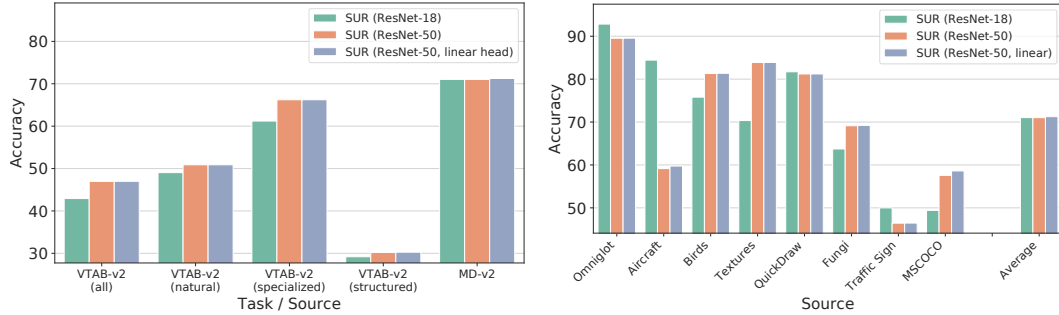

Figure 9: Ablation study for different hyper parameters found by ProtoMAML and MD-Transfer, broken down by downstream task, for Meta Dataset-v2 (*top*) and VTAB (*bottom*). All backbones are trained the all MD-V2 training data.

Overall these results are encouraging, but a more thorough investigation is needed before we can draw definitive conclusions.

| Data source               | MD-Transfer        | ProtoMAML          | ProtoNets          | CTX                | BiT-ResNet-101x3   | BiT-ResNet-18      |
|---------------------------|--------------------|--------------------|--------------------|--------------------|--------------------|--------------------|
| Omniglot                  | $80.92 \pm 1.20\%$ | $68.35 \pm 1.28\%$ | $65.47 \pm 1.35\%$ | $84.55 \pm 0.94\%$ | $72.35 \pm 4.70\%$ | $71.87 \pm 4.38\%$ |
| Aircraft                  | $75.45 \pm 1.20\%$ | $58.18 \pm 0.96\%$ | $54.25 \pm 1.03\%$ | $85.31 \pm 0.83\%$ | $78.34 \pm 3.57\%$ | $70.23 \pm 3.78\%$ |
| Birds                     | $61.23 \pm 1.30\%$ | $69.69 \pm 0.98\%$ | $64.78 \pm 0.98\%$ | $72.92 \pm 1.07\%$ | $91.02 \pm 1.49\%$ | $81.65 \pm 2.26\%$ |
| DTD                       | $66.66 \pm 1.01\%$ | $68.71 \pm 0.83\%$ | $64.91 \pm 0.76\%$ | $77.29 \pm 0.71\%$ | $87.06 \pm 2.61\%$ | $78.62 \pm 2.86\%$ |
| QuickDraw                 | $61.12 \pm 1.06\%$ | $55.52 \pm 1.02\%$ | $53.26 \pm 1.02\%$ | $73.29 \pm 0.78\%$ | $65.08 \pm 4.13\%$ | $64.81 \pm 3.71\%$ |
| Fungi                     | $35.39 \pm 1.08\%$ | $38.88 \pm 1.05\%$ | $36.37 \pm 1.08\%$ | $47.95 \pm 1.19\%$ | $60.68 \pm 4.43\%$ | $49.81 \pm 4.28\%$ |
| Traffic Sign              | $85.31 \pm 0.95\%$ | $53.83 \pm 1.05\%$ | $50.27 \pm 1.05\%$ | $80.12 \pm 0.97\%$ | $76.23 \pm 4.68\%$ | $69.53 \pm 4.55\%$ |
| MSCOCO                    | $39.66 \pm 1.05\%$ | $43.32 \pm 1.12\%$ | $41.08 \pm 0.99\%$ | $51.39 \pm 1.06\%$ | $69.74 \pm 2.69\%$ | $57.84 \pm 3.03\%$ |
| Caltech101                | 70.00 %            | 78.81 %            | 74.18 %            | 84.24 %            | 88.59 %            | 83.32 %            |
| CIFAR100                  | 32.57 %            | 36.22 %            | 31.13 %            | 37.51 %            | 58.35 %            | 49.37 %            |
| Flowers102                | 66.69 %            | 65.39 %            | 61.99 %            | 81.75 %            | 81.88 %            | 76.38 %            |
| Pets                      | 49.06 %            | 68.33 %            | 58.33 %            | 70.88 %            | 89.97 %            | 78.95 %            |
| Sun397                    | 15.05 %            | 8.05 %             | 17.73 %            | 24.79 %            | 35.47 %            | 27.09 %            |
| SVHN                      | 83.54 %            | 45.31 %            | 38.06 %            | 67.22 %            | 79.23 %            | 80.71 %            |
| EuroSAT                   | 89.41 %            | 83.02 %            | 80.63 %            | 86.43 %            | 94.64 %            | 93.53 %            |
| Resics45                  | 65.46 %            | 57.79 %            | 54.11 %            | 67.65 %            | 76.71 %            | 71.03 %            |
| Patch Camelyon            | 81.11 %            | 76.75 %            | 74.26 %            | 79.77 %            | 82.97 %            | 79.73 %            |
| Retinopathy               | 58.07 %            | 73.51 %            | 28.82 %            | 35.48 %            | 73.85 %            | 67.06 %            |
| CLEVR-count               | 40.09 %            | 30.32 %            | 30.33 %            | 27.89 %            | 70.73 %            | 50.59 %            |
| CLEVR-dist                | 52.97 %            | 34.29 %            | 39.99 %            | 29.61 %            | 54.19 %            | 58.79 %            |
| dSprites-loc              | 83.81 %            | 36.68 %            | 32.95 %            | 23.19 %            | 95.38 %            | 93.39 %            |
| dSprites-ori              | 46.70 %            | 18.69 %            | 15.60 %            | 46.92 %            | 61.13 %            | 52.15 %            |
| SmallNORB-azi             | 36.40 %            | 12.20 %            | 12.21 %            | 37.02 %            | 17.50 %            | 23.17 %            |
| SmallNORB-elev            | 31.29 %            | 18.26 %            | 18.02 %            | 21.62 %            | 36.40 %            | 28.92 %            |
| DMLab                     | 43.14 %            | 33.28 %            | 32.12 %            | 31.92 %            | 45.58 %            | 41.86 %            |
| KITTI-dist                | 64.70 %            | 56.96 %            | 55.70 %            | 54.34 %            | 82.24 %            | 76.15 %            |
| <b>MD-v2</b>              | 63.22 %            | 57.06 %            | 53.80 %            | 71.60 %            | 75.06 %            | 68.04 %            |
| <b>VTAB (all)</b>         | 56.11 %            | 46.33 %            | 42.01 %            | 50.46 %            | 68.04 %            | 62.90 %            |
| <b>VTAB (natural)</b>     | 52.82 %            | 50.35 %            | 46.90 %            | 61.07 %            | 72.25 %            | 65.97 %            |
| <b>VTAB (specialized)</b> | 73.51 %            | 72.77 %            | 59.45 %            | 67.33 %            | 82.04 %            | 77.84 %            |
| <b>VTAB (structured)</b>  | 49.89 %            | 30.08 %            | 29.62 %            | 34.06 %            | 57.89 %            | 53.13 %            |

Table 4: VTAB+MD accuracies for approaches trained only on ImageNet.

| Data source               | MD-Transfer        | ProtoMAML          | ProtoNets          | SUR                | BiT-ResNet-101x3 (JFT) |
|---------------------------|--------------------|--------------------|--------------------|--------------------|------------------------|
| Omniglot                  | $82.04 \pm 1.27\%$ | $90.15 \pm 0.65\%$ | $85.29 \pm 0.89\%$ | $92.84 \pm 0.52\%$ | $76.45 \pm 4.04\%$     |
| Aircraft                  | $76.77 \pm 1.16\%$ | $82.10 \pm 0.60\%$ | $74.34 \pm 0.81\%$ | $84.44 \pm 0.58\%$ | $93.30 \pm 1.44\%$     |
| Birds                     | $61.23 \pm 1.29\%$ | $73.36 \pm 0.92\%$ | $68.00 \pm 1.01\%$ | $75.80 \pm 0.96\%$ | $97.06 \pm 0.53\%$     |
| DTD                       | $65.98 \pm 1.07\%$ | $66.32 \pm 0.76\%$ | $65.26 \pm 0.69\%$ | $70.35 \pm 0.72\%$ | $88.96 \pm 2.14\%$     |
| QuickDraw                 | $61.29 \pm 1.06\%$ | $66.37 \pm 0.95\%$ | $60.57 \pm 1.00\%$ | $81.71 \pm 0.57\%$ | $71.27 \pm 3.77\%$     |
| Fungi                     | $35.47 \pm 1.05\%$ | $46.32 \pm 1.11\%$ | $39.84 \pm 1.10\%$ | $63.72 \pm 1.08\%$ | $62.59 \pm 4.29\%$     |
| Traffic Sign              | $84.71 \pm 0.94\%$ | $50.28 \pm 1.05\%$ | $49.79 \pm 1.07\%$ | $49.99 \pm 1.08\%$ | $69.13 \pm 5.34\%$     |
| MSCOCO                    | $39.56 \pm 1.00\%$ | $39.00 \pm 1.04\%$ | $39.65 \pm 1.03\%$ | $49.41 \pm 1.08\%$ | $76.36 \pm 2.23\%$     |
| Caltech101                | 70.58 %            | 73.06 %            | 71.98 %            | 82.33 %            | 91.78 %                |
| CIFAR100                  | 31.33 %            | 29.72 %            | 27.70 %            | 33.69 %            | 76.32 %                |
| Flowers102                | 66.08 %            | 60.22 %            | 57.11 %            | 55.72 %            | 99.33 %                |
| Pets                      | 49.09 %            | 56.61 %            | 50.99 %            | 76.34 %            | 95.45 %                |
| Sun397                    | 13.94 %            | 8.05 %             | 14.19 %            | 27.49 %            | 57.24 %                |
| SVHN                      | 83.20 %            | 46.78 %            | 41.93 %            | 18.66 %            | 66.47 %                |
| EuroSAT                   | 88.74 %            | 80.07 %            | 77.74 %            | 78.91 %            | 95.33 %                |
| Resics45                  | 63.67 %            | 53.48 %            | 50.79 %            | 62.40 %            | 85.76 %                |
| Patch Camelyon            | 81.53 %            | 75.85 %            | 73.75 %            | 75.60 %            | 81.81 %                |
| Retinopathy               | 57.61 %            | 73.18 %            | 28.04 %            | 27.91 %            | 72.02 %                |
| CLEVR-count               | 40.30 %            | 32.72 %            | 31.96 %            | 29.99 %            | 61.54 %                |
| CLEVR-dist                | 52.86 %            | 35.43 %            | 39.35 %            | 37.06 %            | 55.96 %                |
| dSprites-loc              | 85.87 %            | 41.96 %            | 38.07 %            | 29.96 %            | 96.80 %                |
| dSprites-ori              | 46.41 %            | 23.00 %            | 16.25 %            | 19.84 %            | 63.84 %                |
| SmallNORB-azi             | 36.49 %            | 13.42 %            | 12.27 %            | 12.86 %            | 13.78 %                |
| SmallNORB-elev            | 31.16 %            | 18.76 %            | 17.38 %            | 18.15 %            | 29.68 %                |
| DMLab                     | 43.03 %            | 32.49 %            | 31.83 %            | 33.31 %            | 48.22 %                |
| KITTI-dist                | 58.65 %            | 54.43 %            | 42.05 %            | 52.32 %            | 78.62 %                |
| <b>MD-v2</b>              | 63.38 %            | 64.24 %            | 60.34 %            | 71.03 %            | 79.39 %                |
| <b>VTAB (all)</b>         | 55.59 %            | 44.96 %            | 40.19 %            | 42.92 %            | 70.55 %                |
| <b>VTAB (natural)</b>     | 52.37 %            | 45.74 %            | 43.98 %            | 49.04 %            | 81.10 %                |
| <b>VTAB (specialized)</b> | 72.89 %            | 70.65 %            | 57.58 %            | 61.20 %            | 83.73 %                |
| <b>VTAB (structured)</b>  | 49.35 %            | 31.52 %            | 28.65 %            | 29.19 %            | 56.05 %                |

Table 5: VTAB+MD accuracies for approaches trained on more data (all of MD-v2’s training sources, unless noted otherwise).

| Data source               | BiT-ResNet-18<br>(126 × 126) | BiT-ResNet-18<br>(224 × 224) | BiT-ResNet-50<br>(126 × 126) | BiT-ResNet-50<br>(224 × 224) | CTX           |
|---------------------------|------------------------------|------------------------------|------------------------------|------------------------------|---------------|
| Omniglot                  | 71.87 ± 4.38%                | 72.73 ± 4.64%                | 68.56 ± 4.68%                | 68.03 ± 4.86%                | 84.55 ± 0.94% |
| Aircraft                  | 70.23 ± 3.78%                | 73.61 ± 3.80%                | 74.09 ± 3.64%                | 77.42 ± 3.55%                | 85.31 ± 0.83% |
| Birds                     | 81.65 ± 2.26%                | 87.22 ± 1.88%                | 86.82 ± 1.57%                | 90.82 ± 1.46%                | 72.92 ± 1.07% |
| DTD                       | 78.62 ± 2.86%                | 82.62 ± 2.70%                | 82.35 ± 2.56%                | 84.97 ± 2.53%                | 77.29 ± 0.71% |
| QuickDraw                 | 64.81 ± 3.71%                | 66.34 ± 3.60%                | 66.98 ± 3.62%                | 66.56 ± 3.69%                | 73.29 ± 0.78% |
| Fungi                     | 49.81 ± 4.28%                | 53.93 ± 4.44%                | 54.63 ± 4.20%                | 59.37 ± 4.25%                | 47.95 ± 1.19% |
| Traffic Sign              | 69.53 ± 4.55%                | 75.39 ± 4.34%                | 71.09 ± 4.66%                | 73.52 ± 4.69%                | 80.12 ± 0.97% |
| MSCOCO                    | 57.84 ± 3.03%                | 59.97 ± 2.89%                | 64.55 ± 2.93%                | 65.69 ± 2.71%                | 51.39 ± 1.06% |
| Caltech101                | 83.32 %                      | 84.59 %                      | 85.69 %                      | 87.22 %                      | 84.24 %       |
| CIFAR100                  | 49.37 %                      | 47.10 %                      | 55.85 %                      | 54.42 %                      | 37.51 %       |
| Flowers102                | 76.38 %                      | 82.65 %                      | 81.87 %                      | 83.33 %                      | 81.75 %       |
| Pets                      | 78.95 %                      | 83.91 %                      | 86.07 %                      | 87.91 %                      | 70.88 %       |
| Sun397                    | 27.09 %                      | 29.11 %                      | 31.62 %                      | 33.29 %                      | 24.79 %       |
| SVHN                      | 80.71 %                      | 83.40 %                      | 78.47 %                      | 70.40 %                      | 67.22 %       |
| EuroSAT                   | 93.53 %                      | 93.82 %                      | 94.14 %                      | 94.44 %                      | 86.43 %       |
| Resisc45                  | 71.03 %                      | 74.12 %                      | 74.92 %                      | 76.13 %                      | 67.65 %       |
| Patch Camelyon            | 79.73 %                      | 80.67 %                      | 81.55 %                      | 83.06 %                      | 79.77 %       |
| Retinopathy               | 67.06 %                      | 74.47 %                      | 71.15 %                      | 70.24 %                      | 35.48 %       |
| CLEVR-count               | 50.59 %                      | 55.25 %                      | 53.69 %                      | 74.03 %                      | 27.89 %       |
| CLEVR-dist                | 58.79 %                      | 58.69 %                      | 54.59 %                      | 51.55 %                      | 29.61 %       |
| dSprites-loc              | 93.39 %                      | 98.59 %                      | 92.53 %                      | 82.72 %                      | 23.19 %       |
| dSprites-ori              | 52.15 %                      | 46.46 %                      | 51.40 %                      | 55.11 %                      | 46.92 %       |
| SmallNORB-azi             | 23.17 %                      | 20.71 %                      | 20.10 %                      | 17.79 %                      | 37.02 %       |
| SmallNORB-elev            | 28.92 %                      | 21.75 %                      | 26.95 %                      | 32.07 %                      | 21.62 %       |
| DMLab                     | 41.86 %                      | 43.74 %                      | 42.54 %                      | 43.18 %                      | 31.92 %       |
| KITTI-dist                | 76.15 %                      | 78.78 %                      | 77.80 %                      | 79.93 %                      | 54.34 %       |
| <b>MD-v2</b>              | 68.04 %                      | 71.48 %                      | 71.14 %                      | 73.30 %                      | 71.60 %       |
| <b>VTAB (all)</b>         | 62.90 %                      | 64.32 %                      | 64.50 %                      | 65.38 %                      | 50.46 %       |
| <b>VTAB (natural)</b>     | 65.97 %                      | 68.46 %                      | 69.93 %                      | 69.43 %                      | 61.07 %       |
| <b>VTAB (specialized)</b> | 77.84 %                      | 80.77 %                      | 80.44 %                      | 80.97 %                      | 67.33 %       |
| <b>VTAB (structured)</b>  | 53.13 %                      | 53.00 %                      | 52.45 %                      | 54.55 %                      | 34.06 %       |

Table 6: VTAB+MD accuracies for BiT learners trained on various input resolutions and network capacities. CrossTransformers (CTX) accuracies are provided for context. All approaches are trained only on ImageNet.

| Data source               | BiT-ResNet-50 (GNWS) | BiT-ResNet-50 (BN) |
|---------------------------|----------------------|--------------------|
| Omniglot                  | $68.03 \pm 4.86\%$   | $61.66 \pm 5.13\%$ |
| Aircraft                  | $77.42 \pm 3.55\%$   | $76.82 \pm 3.71\%$ |
| Birds                     | $90.82 \pm 1.46\%$   | $87.59 \pm 1.84\%$ |
| DTD                       | $84.97 \pm 2.53\%$   | $83.72 \pm 3.39\%$ |
| QuickDraw                 | $66.56 \pm 3.69\%$   | $63.83 \pm 4.03\%$ |
| Fungi                     | $59.37 \pm 4.25\%$   | $53.77 \pm 4.43\%$ |
| Traffic Sign              | $73.52 \pm 4.69\%$   | $70.46 \pm 4.70\%$ |
| MSCOCO                    | $65.69 \pm 2.71\%$   | $61.50 \pm 2.73\%$ |
| Caltech101                | 87.22 %              | 88.72 %            |
| CIFAR100                  | 54.42 %              | 53.78 %            |
| Flowers102                | 83.33 %              | 85.45 %            |
| Pets                      | 87.91 %              | 88.24 %            |
| Sun397                    | 33.29 %              | 31.60 %            |
| SVHN                      | 70.40 %              | 85.57 %            |
| EuroSAT                   | 94.44 %              | 95.35 %            |
| Resics45                  | 76.13 %              | 79.02 %            |
| Patch Camelyon            | 83.06 %              | 80.13 %            |
| Retinopathy               | 70.24 %              | 73.13 %            |
| CLEVR-count               | 74.03 %              | 43.10 %            |
| CLEVR-dist                | 51.55 %              | 49.65 %            |
| dSprites-loc              | 82.72 %              | 83.19 %            |
| dSprites-ori              | 55.11 %              | 46.49 %            |
| SmallNORB-azi             | 17.79 %              | 18.93 %            |
| SmallNORB-elev            | 32.07 %              | 34.32 %            |
| DMLab                     | 43.18 %              | 44.67 %            |
| KITTI-dist                | 79.93 %              | 76.97 %            |
| <b>MD-v2</b>              | 73.30 %              | 69.92 %            |
| <b>VTAB (all)</b>         | 65.38 %              | 64.35 %            |
| <b>VTAB (natural)</b>     | 69.43 %              | 72.22 %            |
| <b>VTAB (specialized)</b> | 80.97 %              | 81.91 %            |
| <b>VTAB (structured)</b>  | 54.55 %              | 49.67 %            |

Table 7: VTAB+MD accuracies for BiT learners trained with either group normalization + weight standardization (GNWS) or batch normalization (BN). All approaches are trained only on  $224 \times 224$  ImageNet examples.



| Data source               | BiT-ResNet-101x3<br>(ImageNet) | BiT-ResNet-101x3<br>(ImageNet-21k) | BiT-ResNet-101x3<br>(JFT) | CTX               |
|---------------------------|--------------------------------|------------------------------------|---------------------------|-------------------|
| Omniglot                  | 72.35 $\pm$ 4.70%              | 78.49 $\pm$ 4.00%                  | 76.45 $\pm$ 4.04%         | 84.55 $\pm$ 0.94% |
| Aircraft                  | 78.34 $\pm$ 3.57%              | 75.49 $\pm$ 4.32%                  | 93.30 $\pm$ 1.44%         | 85.31 $\pm$ 0.83% |
| Birds                     | 91.02 $\pm$ 1.49%              | 98.10 $\pm$ 0.45%                  | 97.06 $\pm$ 0.53%         | 72.92 $\pm$ 1.07% |
| DTD                       | 87.06 $\pm$ 2.61%              | 89.79 $\pm$ 2.40%                  | 88.96 $\pm$ 2.14%         | 77.29 $\pm$ 0.71% |
| QuickDraw                 | 65.08 $\pm$ 4.13%              | 69.16 $\pm$ 3.79%                  | 71.27 $\pm$ 3.77%         | 73.29 $\pm$ 0.78% |
| Fungi                     | 60.68 $\pm$ 4.43%              | 70.70 $\pm$ 3.91%                  | 62.59 $\pm$ 4.29%         | 47.95 $\pm$ 1.19% |
| Traffic Sign              | 76.23 $\pm$ 4.68%              | 72.51 $\pm$ 4.73%                  | 69.13 $\pm$ 5.34%         | 80.12 $\pm$ 0.97% |
| MSCOCO                    | 69.74 $\pm$ 2.69%              | 76.07 $\pm$ 2.26%                  | 76.36 $\pm$ 2.23%         | 51.39 $\pm$ 1.06% |
| Caltech101                | 88.59 %                        | 89.54 %                            | 91.78 %                   | 84.24 %           |
| CIFAR100                  | 58.35 %                        | 78.08 %                            | 76.32 %                   | 37.51 %           |
| Flowers102                | 81.88 %                        | 99.09 %                            | 99.33 %                   | 81.75 %           |
| Pets                      | 89.97 %                        | 92.00 %                            | 95.45 %                   | 70.88 %           |
| Sun397                    | 35.47 %                        | 50.35 %                            | 57.24 %                   | 24.79 %           |
| SVHN                      | 79.23 %                        | 69.08 %                            | 66.47 %                   | 67.22 %           |
| EuroSAT                   | 94.64 %                        | 95.63 %                            | 95.33 %                   | 86.43 %           |
| Resisc45                  | 76.71 %                        | 80.77 %                            | 85.76 %                   | 67.65 %           |
| Patch Camelyon            | 82.97 %                        | 81.26 %                            | 81.81 %                   | 79.77 %           |
| Retinopathy               | 73.85 %                        | 75.27 %                            | 72.02 %                   | 35.48 %           |
| CLEVR-count               | 70.73 %                        | 66.75 %                            | 61.54 %                   | 27.89 %           |
| CLEVR-dist                | 54.19 %                        | 53.85 %                            | 55.96 %                   | 29.61 %           |
| dSprites-loc              | 95.38 %                        | 90.00 %                            | 96.80 %                   | 23.19 %           |
| dSprites-ori              | 61.13 %                        | 62.47 %                            | 63.84 %                   | 46.92 %           |
| SmallNORB-azi             | 17.50 %                        | 15.40 %                            | 13.78 %                   | 37.02 %           |
| SmallNORB-elev            | 36.40 %                        | 37.05 %                            | 29.68 %                   | 21.62 %           |
| DMLab                     | 45.58 %                        | 45.37 %                            | 48.22 %                   | 31.92 %           |
| KITTI-dist                | 82.24 %                        | 78.45 %                            | 78.62 %                   | 54.34 %           |
| <b>MD-v2</b>              | 75.06 %                        | 78.79 %                            | 79.39 %                   | 71.60 %           |
| <b>VTAB (all)</b>         | 68.04 %                        | 70.02 %                            | 70.55 %                   | 50.46 %           |
| <b>VTAB (natural)</b>     | 72.25 %                        | 79.69 %                            | 81.10 %                   | 61.07 %           |
| <b>VTAB (specialized)</b> | 82.04 %                        | 83.23 %                            | 83.73 %                   | 67.33 %           |
| <b>VTAB (structured)</b>  | 57.89 %                        | 56.17 %                            | 56.05 %                   | 34.06 %           |

Table 8: VTAB+MD accuracies for BiT-L learners trained on varying amounts of upstream data. CrossTransformers (CTX) accuracies are provided for context. All approaches are trained on  $224 \times 224$  inputs.

| Data source  | BiT-ResNet-50 (JFT) | BiT-ResNet-50 (JFT, deduplicated) | BiT-ResNet-50 (JFT, class-ablated) |
|--------------|---------------------|-----------------------------------|------------------------------------|
| Omniglot     | $69.37 \pm 4.42\%$  | $69.89 \pm 4.71\%$                | $69.10 \pm 4.72\%$                 |
| Aircraft     | $87.13 \pm 2.28\%$  | $86.27 \pm 2.25\%$                | $73.09 \pm 3.76\%$                 |
| Birds        | $92.50 \pm 1.24\%$  | $92.59 \pm 1.16\%$                | $79.22 \pm 2.92\%$                 |
| DTD          | $87.43 \pm 2.05\%$  | $87.48 \pm 2.21\%$                | $87.72 \pm 2.14\%$                 |
| QuickDraw    | $63.99 \pm 4.23\%$  | $63.65 \pm 4.23\%$                | $64.45 \pm 4.05\%$                 |
| Fungi        | $56.03 \pm 4.22\%$  | $56.48 \pm 4.47\%$                | $54.94 \pm 4.53\%$                 |
| Traffic Sign | $66.21 \pm 4.94\%$  | $66.13 \pm 5.03\%$                | $63.79 \pm 4.98\%$                 |
| MSCOCO       | $70.39 \pm 2.44\%$  | $71.06 \pm 2.40\%$                | $70.15 \pm 2.55\%$                 |
| <b>MD-v2</b> | <b>74.13 %</b>      | <b>74.19 %</b>                    | <b>70.31 %</b>                     |

Table 9: VTAB+MD accuracies for BiT-L learners trained on ablated JFT variants. The deduplicated variant of JFT removes all images that are found in MD-v2 test sources, and the class-ablated variant removes all images belonging to airplane-, birds-, and fungi-related classes. All approaches are trained on  $224 \times 224$  inputs.
